# Supplementary material for: A new zinc–zinc-bonded compound with a dianionic α-diimine ligand: synthesis and structure of [Na(THF)2]2·[LZn–ZnL] (L = [(2,6-iPr2C6H3)N(Me)C]22−)
Source: Royal Society of Chemistry journal article supplement (doi:10.1039/b703200e), 2007-01-01
Supplement: b703200e.pdf [file b703200e.pdf]

## COMPUTATIONS

### A New Zinc-Zinc-Bonded compound with an $\alpha$ -diimine ligand: Synthesis and Structure of $[\text{Na}(\text{THF})_2]_2 \cdot [\text{LZn-ZnL}]$ ( $\text{L} = [(2,6\text{-}i\text{-Pr}_2\text{C}_6\text{H}_3)\text{N}(\text{Me})\text{C}]_2^{2-}$ )

Xiao-Juan Yang,<sup>\*a,c</sup> Jie Yu,<sup>a,e</sup> Yanyan Liu,<sup>b,e</sup> Yaoming Xie,<sup>d</sup> Henry F. Schaefer,<sup>d</sup>  
Yongmin Liang<sup>c</sup> and Biao Wu<sup>\*b,c</sup>

<sup>a</sup> National Engineering Research Center for Fine Petrochemical Intermediates, Lanzhou Institute of Chemical Physics, CAS, Lanzhou 730000, China. Fax: 86 931 4968286; E-mail:

yangxj@lzb.ac.cn

<sup>b</sup> State Key Laboratory for Oxo Synthesis & Selective Oxidation, Lanzhou Institute of Chemical Physics, CAS, Lanzhou 730000, China. E-mail: wubiao@lzb.ac.cn

<sup>c</sup> State Key Laboratory of Applied Organic Chemistry, Lanzhou University, Lanzhou, 730000, China

<sup>d</sup> Center for Computational Chemistry, University of Georgia, Athens, Georgia 30602, USA

<sup>e</sup> Graduate University of Chinese Academy of Sciences, Beijing 100049, China

## The Model Molecule

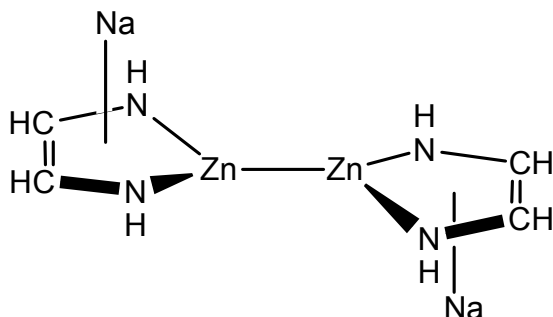

## Cartesian coordinates

---

|    |           |           |           |
|----|-----------|-----------|-----------|
| Zn | .622755   | -.722791  | .705638   |
| Na | .414587   | -.372292  | 3.474998  |
| N  | 2.230117  | -.557023  | 1.919120  |
| N  | .218730   | -2.236272 | 1.981271  |
| C  | 2.442842  | -1.746241 | 2.648901  |
| C  | 1.377100  | -2.635776 | 2.681984  |
| H  | 3.080551  | .000503   | 1.795145  |
| H  | -.484117  | -2.977650 | 1.905132  |
| H  | 3.395649  | -1.953426 | 3.156363  |
| H  | 1.429804  | -3.594744 | 3.216676  |
| Zn | -.622755  | .722791   | -.705638  |
| Na | -.414587  | .372292   | -3.474998 |
| N  | -2.230117 | .557023   | -1.919120 |
| N  | -.218730  | 2.236272  | -1.981271 |
| C  | -2.442842 | 1.746241  | -2.648901 |
| C  | -1.377100 | 2.635776  | -2.681984 |
| H  | -3.080551 | -.000503  | -1.795145 |
| H  | .484117   | 2.977650  | -1.905132 |
| H  | -3.395649 | 1.953426  | -3.156363 |
| H  | -1.429804 | 3.594744  | -3.216676 |

---

## Theoretical Method

The structure of the model molecule  $\text{Zn}_2(\text{NH-CH-CH-NH})_2\text{Na}_2$  was optimized at the BP86 level of theory with DZP++ basis sets using the Gaussian 94 program (Frisch, M. J.; Trucks, G. W.; Schlegel, H. B.; Gill, P. M. W.; Johnson, B. G.; Robb, M. A.; Cheeseman, J. R.; Keith, T.; Petersson, G. A.; Montgomery, J. A.; Raghavachari, K.; Al-Laham, M. A.; Zakrzewski, V. G.; Ortiz, J. V.; Foresman, J. B.; Peng, C. Y.; Ayala, P. Y.; Chen, W.; Wong, M. W.; Andes, J. L.; Replogle, E. S.; Gomperts, R.; Martin, R. L.; Fox, D. J.; Binkley, J. S.; Defrees, D. J.; Baker, J.; Stewart, J. J. P.; Head-Gordon, M.; Gonzalez, C.; Pople, J. A. *Gaussian 94*, Revision B.3; Gaussian Inc.: Pittsburgh, PA, 1995).

The density functional theory (DFT) approach is the BP86 method, which combines Becke's 1988 exchange functional (B) with Perdew's 1986 correlation functional.<sup>i,ii</sup>

In this work the double- $\zeta$  plus polarization (DZP) basis sets used for carbon and nitrogen add one set of pure spherical harmonic d functions with orbital exponents  $\alpha_d(\text{C}) = 0.75$  and  $\alpha_d(\text{N}) = 0.80$  to the Huzinaga-Dunning standard contracted DZ sets and are designated (9s5p1d/4s2p1d).<sup>iii,iv</sup> For Zn, in our loosely contracted DZP basis set, the Wachters' primitive set is used but is augmented by two sets of p functions and one set of d functions, contracted following Hood et al., and designated (14s11p6d/10s8p3d).<sup>v,vi</sup> DZP basis set for Na is McLean and Chandler's DZ set plus a set of d functions with exponent  $\alpha_d(\text{Na}) = 0.175$ , and designated (12s9p1d/6s5p1d).<sup>vii</sup>

- 
- (i) Becke, A. D. *Phys. Rev. A* **1988**, *38*, 3098.  
(ii) Perdew, J. P. *Phys. Rev. B* **1986**, *33*, 8822.  
(iii) Dunning, T. H. *J. Chem. Phys.* **1970**, *53*, 2823  
(iv) Huzinaga, S. *J. Chem. Phys.* **1965**, *42*, 1293.  
(v) Wachters, A. J. H. *J. Chem. Phys.* **1970**, *52*, 1033.  
(vi) Hood, D. M.; Pitzer, R. M.; Schaefer, H. F. *J. Chem. Phys.* **1979**, *71*, 705.  
(vii) McLean, A. D.; Chandler, G. S. *J. Chem. Phys.* **1980**, *72*, 5639.

**Frontier Molecular Orbitals HOMO-1, HOMO, LUMO, LUMO+1, and LUMO+2.**

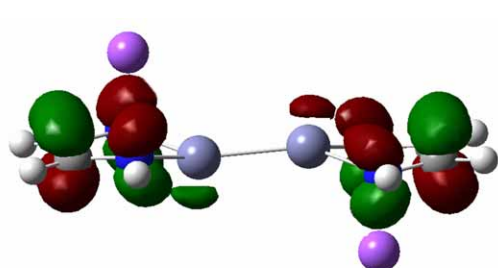

HOMO-1

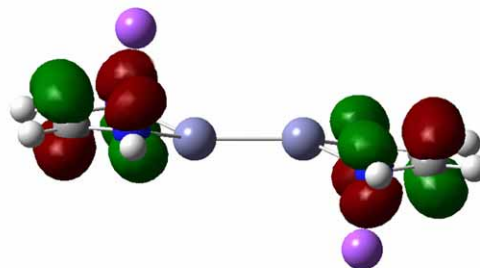

HOMO

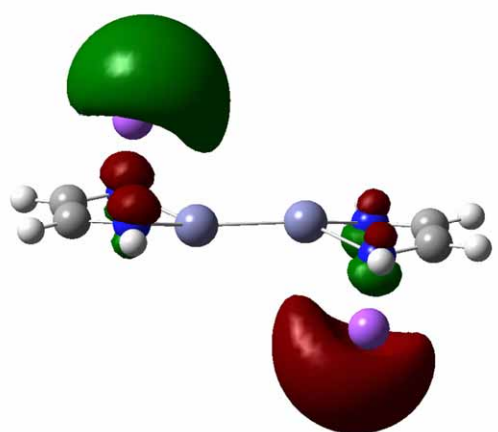

LUMO

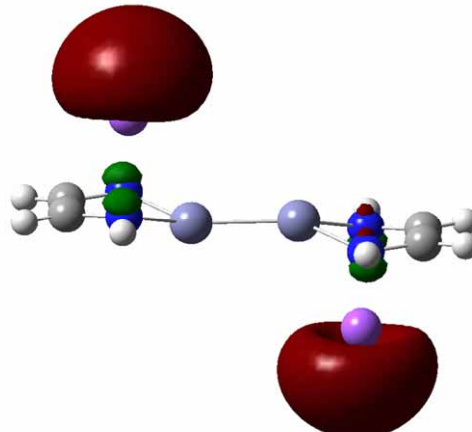

LUMO+1

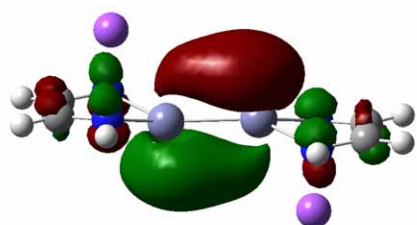

LUMO+2
